# Supplementary material for: Effect of Early-Stage Human Breast Carcinoma on Monocyte Programming
Source: PubMed Central journal article supplement (PMC8882686; doi:10.3389/fonc.2021.800235), 2022-02-14
Supplement: Image_1.pdf [file Image_1.pdf]

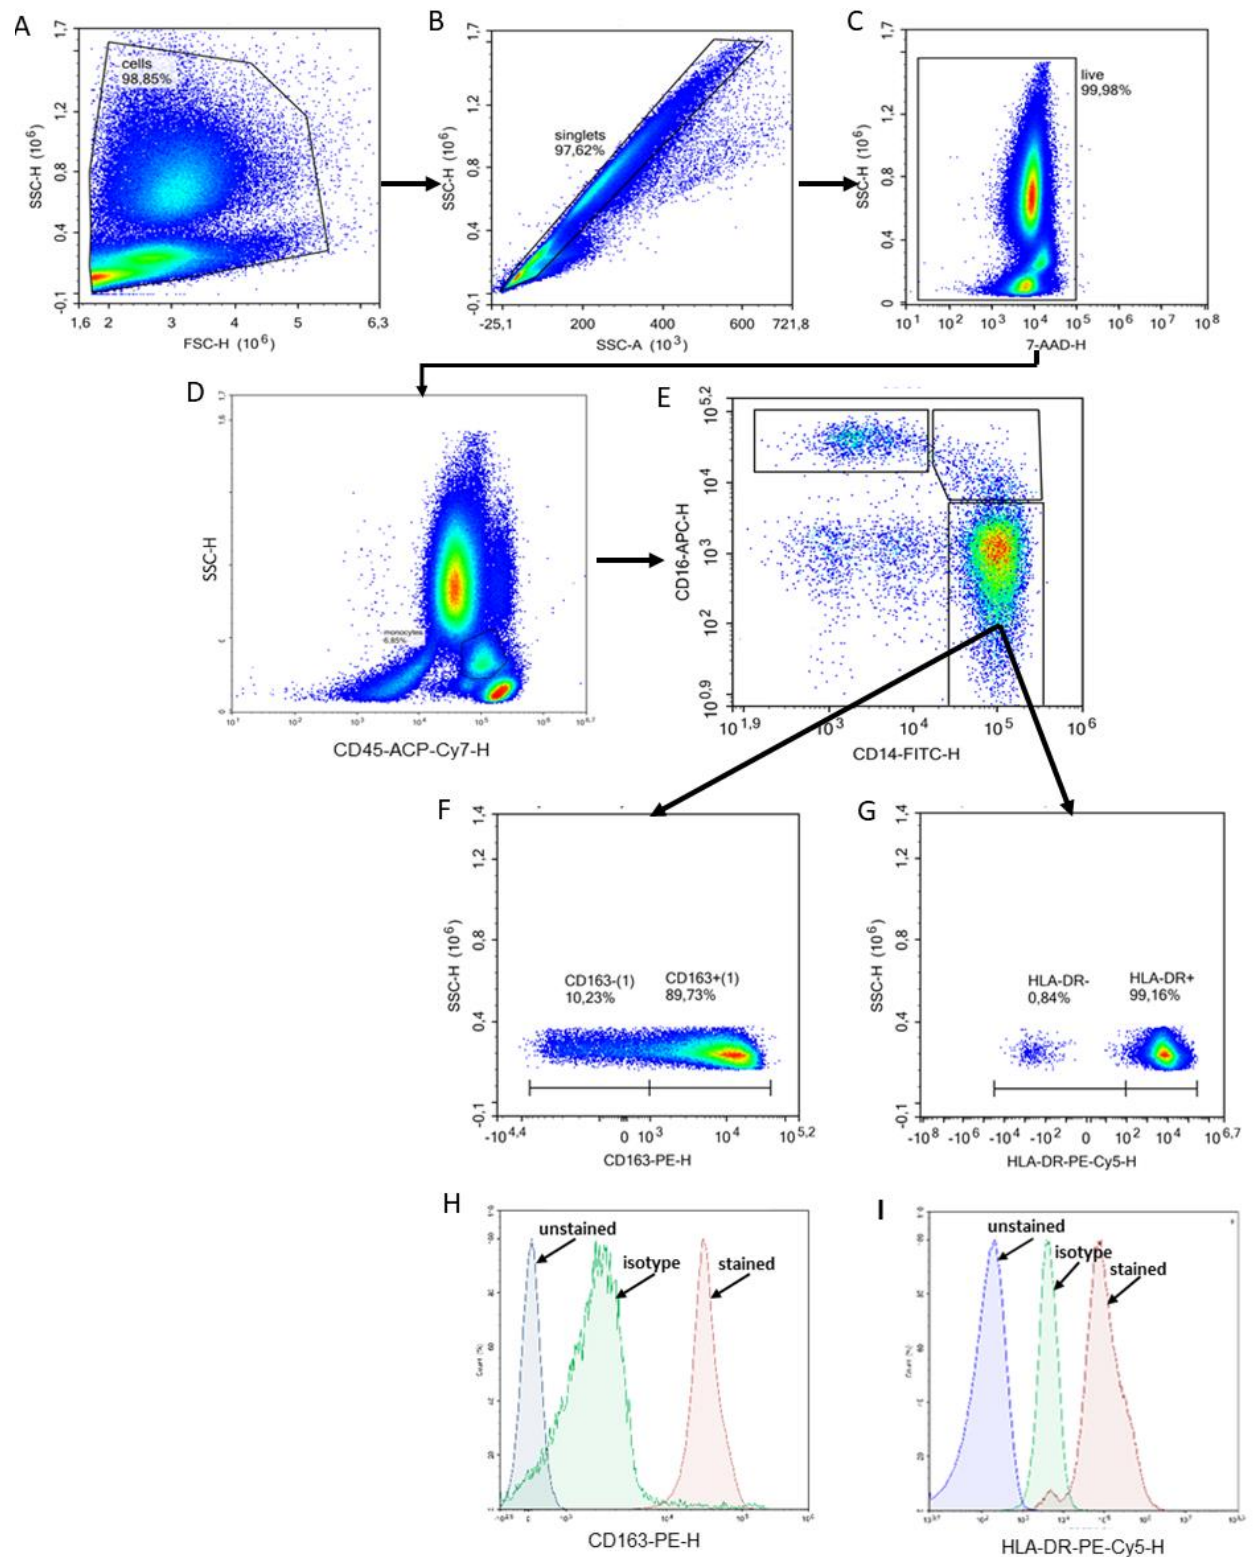

**Figure S1.** Flow cytometry gating strategy for the identification of human monocytes. A - broad selection of leucocytes based on their SSC/FSC properties; B - gating the cells that have an equal area and height, thus removing duplets (clumps); C - gating of live cells; D - monocytes among CD45 + cells; E - CD16 vs. CD14 plot: gating to select monocytes based on their characteristic "L" shape; F,G – CD163+ and HLA-DR+ selection from CD14+16- subset, selection from CD14+16+ and CD14<sup>low</sup>16+ was carried out on the same principle; H,I – isotype control of CD163 and HLA-DR primary antibody conjugation.

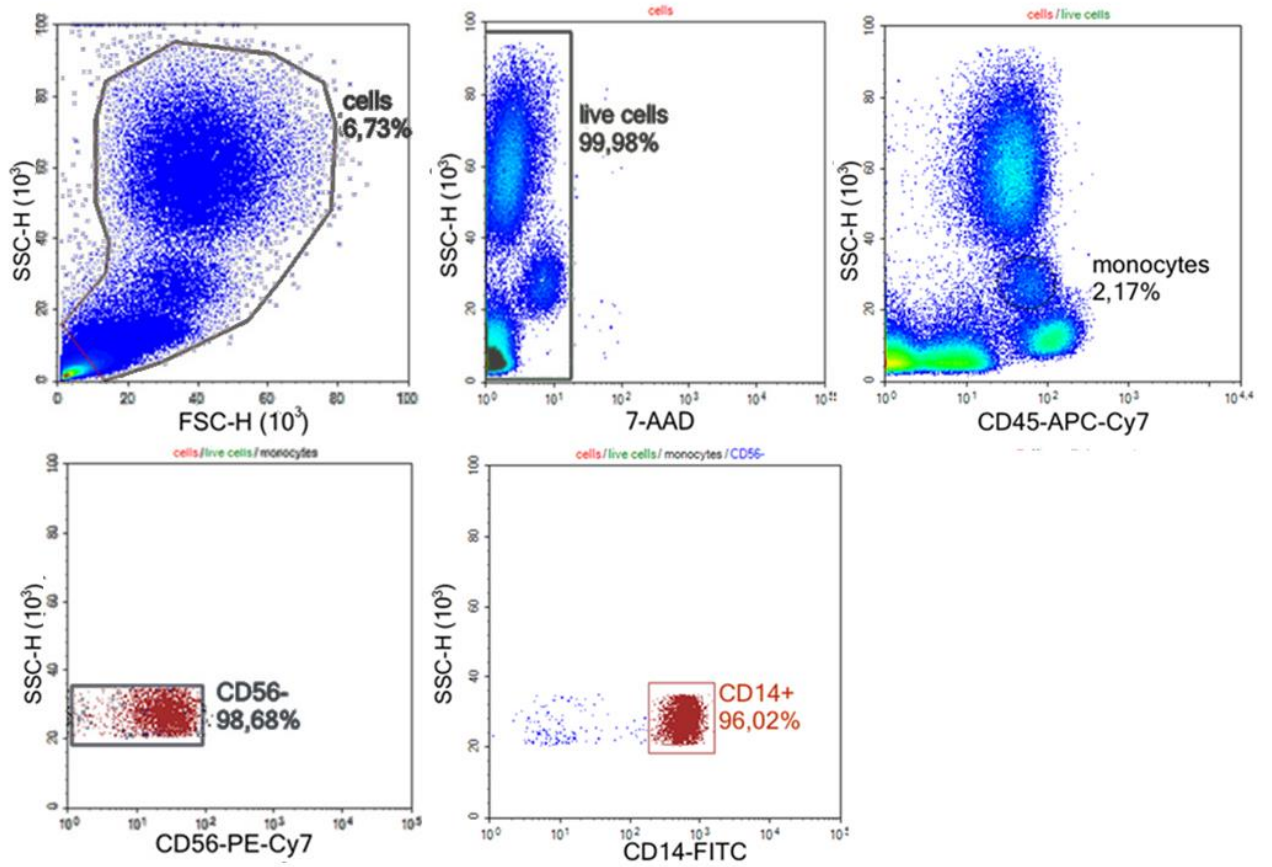

**Figure S2.** Flow cytometry gating strategy for the identification and isolation of human monocytes for transcriptomic analysis of the CD14+.

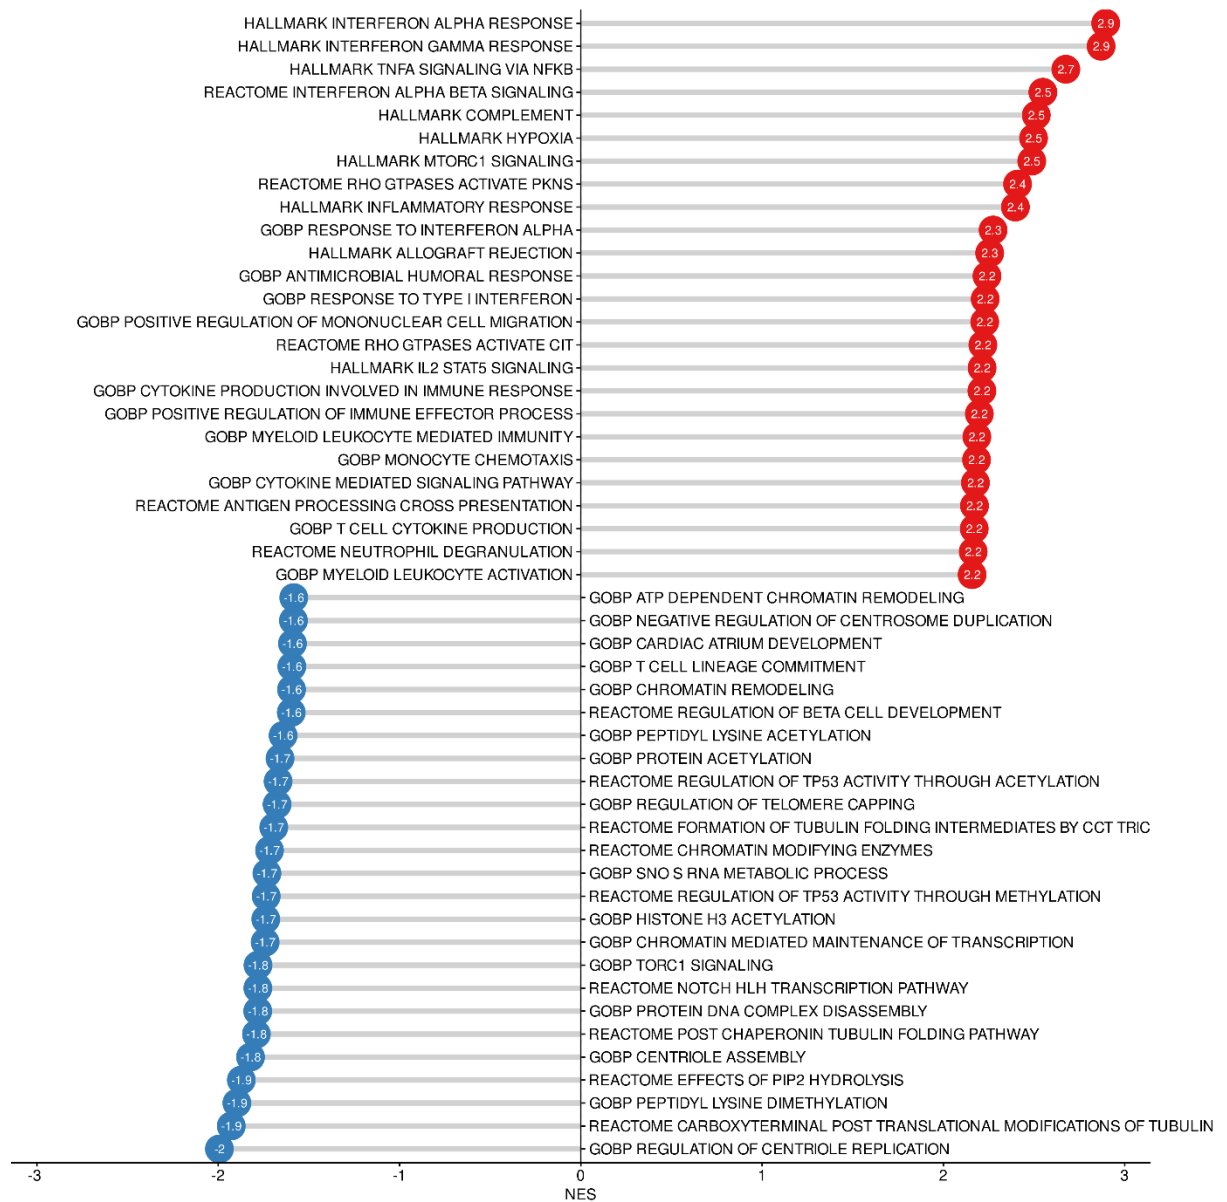

**Figure S3.** GSEA analysis of DEGs between cancer group and healthy group monocytes (blue, downregulated genes; red, upregulated genes)

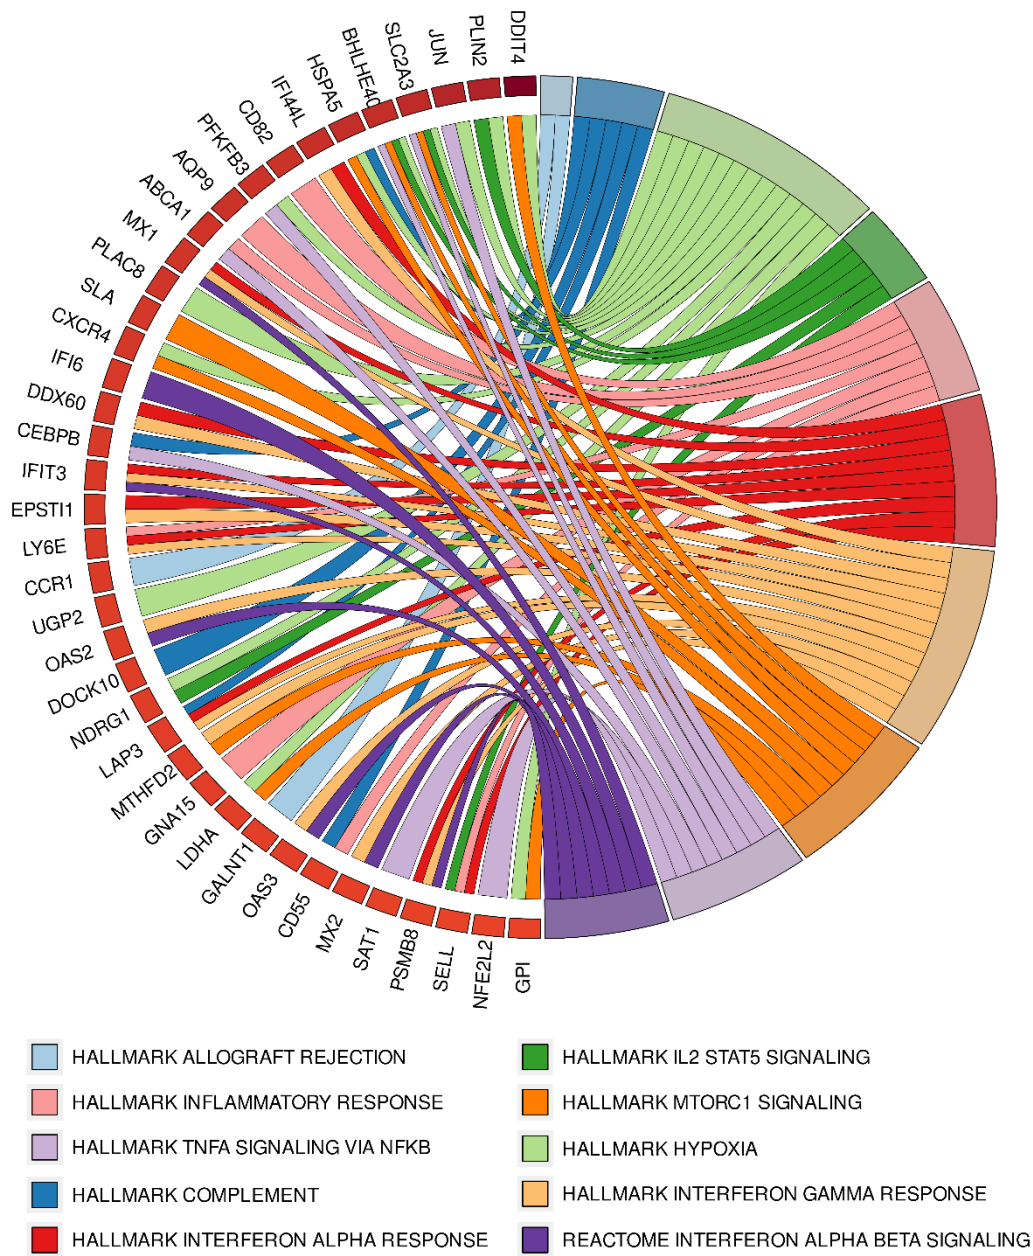

**Figure S4.** GOChord plot integrate genes expression data with the results of a functional pathways analysis.
